# Supplementary material for: Modelling the deep convective transport of trace gases (CO, NH 3 and SO 2 ) from the planetary boundary layer to the Asian summer monsoon anticyclone
Source: Copernicus journal article supplement (doi:10.5194/egusphere-2025-5587), 2025-12-23
Supplement: Supplementary file [file egusphere-2025-5587-AC1-supplement.pdf]

Dear Reviewer,

Many thanks for your constructive comments on our manuscript. We will give point-to-point responses after finishing the comparisons of the model results presented in Figures 2 & 3 with the satellite observations. We have collected the monthly-averaged CO MLS satellite data for 2010-2020. However, the satellite data for NH<sub>3</sub> and SO<sub>2</sub> profiles in the UTLS are very limited.

The MIPAS/Envisat measured the UTLS NH<sub>3</sub> and SO<sub>2</sub> profiles during 2002-2011 as reported by Höpfner et al. (acp-13-10405-2013, acp-15-7017-2015, acp-16-14357-2016). But I am not sure whether the detection limits of MIPAS are low enough to validate our model results, especially for SO<sub>2</sub>. Moreover, there are only two years of overlapped data between our model simulation and MIPAS observations. I will contact Dr. Höpfner for the MIPAS data.

It would be very appreciated if you could give more detailed suggestions on what NH<sub>3</sub> and SO<sub>2</sub> satellite data should be used for comparisons.

Sincerely,  
Jianzhong Ma
